# Supplementary material
Source: HighWire-hosted journal article supplement (https://www.qdcxjkg.com/highwire/filestream/114607/field_highwire_adjunct_files/0/ERJ-00401-2015_supplement.pdf)

## Supplementary Data

### CADD score analysis

CADD analysis (Scaled C-score) [1] was performed.

#### RTEL1 variants identified by WES in FPF families

FAMILY A : scaled C-score=**28.4**

FAMILY B : scaled C-score=**35**

FAMILY C : scaled C-score=**12,95**

FAMILY D : scaled C-score=**25**

#### RTEL1 missense variants >0.1% in EA population (> 8 variants found in 8000 individuals)

|                             |          |                             |     |           |               |
|-----------------------------|----------|-----------------------------|-----|-----------|---------------|
| <a href="#">20:62322290</a> |          | <a href="#">rs190887884</a> |     | G>A       | A=113/G=8185  |
| #Chrom                      | Pos      | Ref                         | Alt | RawScore  | PHRED         |
| 20                          | 62322290 | G                           | A   | 0.010755  | <b>2.497</b>  |
| <a href="#">20:62293272</a> |          | <a href="#">rs3848668</a>   |     | A>G       | G=712/A=7888  |
| #Chrom                      | Pos      | Ref                         | Alt | RawScore  | PHRED         |
| 20                          | 62293272 | A                           | G   | -1.792082 | <b>0.002</b>  |
| <a href="#">20:62293862</a> |          | <a href="#">rs41297642</a>  |     | C>T       | T=43/C=8555   |
| #Chrom                      | Pos      | Ref                         | Alt | RawScore  | PHRED         |
| 20                          | 62293862 | C                           | T   | 0.183848  | <b>4.293</b>  |
| <a href="#">20:62309621</a> |          | <a href="#">rs143550996</a> |     | T>C       | C=9/T=8591    |
| #Chrom                      | Pos      | Ref                         | Alt | RawScore  | PHRED         |
| 20                          | 62309621 | T                           | C   | -0.637851 | <b>0.073</b>  |
| <a href="#">20:62321128</a> |          | <a href="#">rs35640778</a>  |     | G>A       | A=152/G=8430  |
| #Chrom                      | Pos      | Ref                         | Alt | RawScore  | PHRED         |
| 20                          | 62321128 | G                           | A   | 3.329118  | <b>22.7</b>   |
| <a href="#">20:62324290</a> |          | <a href="#">rs61736615</a>  |     | G>A       | A=318/G=8266  |
| #Chrom                      | Pos      | Ref                         | Alt | RawScore  | PHRED         |
| 20                          | 62324290 | G                           | A   | 0.189811  | <b>4.359</b>  |
| <a href="#">20:62325833</a> |          | <a href="#">rs115610405</a> |     | C>A       | A=163/C=8391  |
| #Chrom                      | Pos      | Ref                         | Alt | RawScore  | PHRED         |
| 20                          | 62325833 | C                           | A   | 0.274745  | <b>5.283</b>  |
| <a href="#">20:62326110</a> |          | <a href="#">rs3208008</a>   |     | A>C       | C=6574/A=1972 |
| #Chrom                      | Pos      | Ref                         | Alt | RawScore  | PHRED         |
| 20                          | 62326110 | A                           | C   | 0.143789  | <b>3.855</b>  |

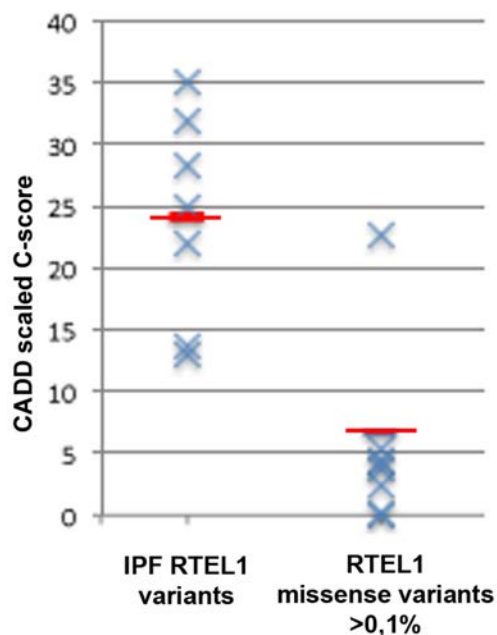

#### Supplementary reference :

1. Kircher M, Witten DM, Jain P, O'Roak BJ, Cooper GM, Shendure J. A general framework for estimating the relative pathogenicity of human genetic variants. *Nat Genet.* **2014** Mar;46:310-315.

### ***Molecular modelling and 3D structure visualisation***

Alignment of the human RTEL1 sequence with that of the *T. acidophilum* XPD, whose 3D structure is known (pdb 2vsf and 4a15). Secondary structures are indicated above the alignment and are colored according to their domains (indicated at top), as reported in [1]. The two mutations reported here are indicated below the RTEL1 sequence. They belong to highly conserved regions.

The alignment was deduced from the results of HH-PRED [2], Phyre2 [3] and I-TASSER [4], and was refined for the most divergent regions (especially the ARCH domain) using Hydrophobic Cluster Analysis [5] (and our unpublished results).

#### **Supplementary references :**

1. Wolski SC, Kuper J, Hanzelmann P, Truglio JJ, Croteau DL, Van Houten B, Kisker C. Crystal structure of the FeS cluster-containing nucleotide excision repair helicase XPD. *PLoS Biol* 2008; 6: e149.
2. Soding J, Biegert A, Lupas AN. The HHpred interactive server for protein homology detection and structure prediction. *Nucleic Acids Res* 2005; 33: W244-248.
3. Kelley LA, Sternberg MJ. Protein structure prediction on the Web: a case study using the Phyre server. *Nat Protoc* 2009; 4: 363-371.
4. Yang J, Yan R, Roy A, Xu D, Poisson J, Zhang Y. The I-TASSER Suite: protein structure and function prediction. *Nat Methods* 2015; 12: 7-8.
5. Callebaut I, Labesse G, Durand P, Poupon A, Canard L, Chomilier J, Henrissat B, Mornon JP. Deciphering protein sequence information through hydrophobic cluster analysis (HCA): current status and perspectives. *Cell Mol Life Sci* 1997; 53: 621-645.

# HD1 Fe-S ARCH HD2

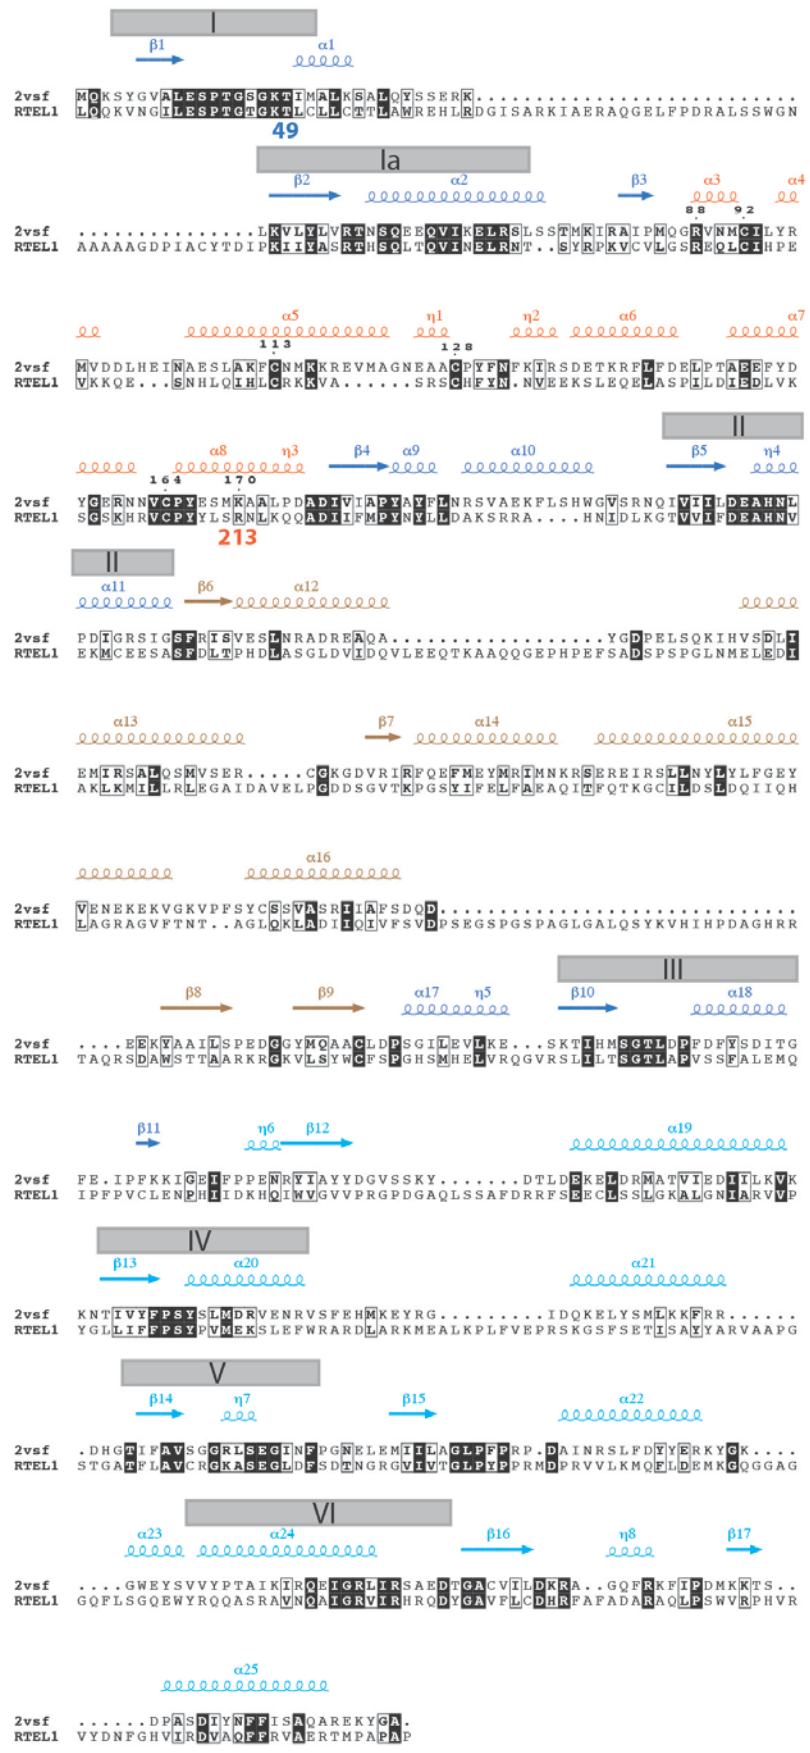

### Conservation

GERP scores analysis of nucleotides targeted by RTEL1 mutations were obtained on UCSC genome browser based on their position in hg 19 human genome version. Chr20 (Hg19/GRCh37)

FAMILY A : g.62292694

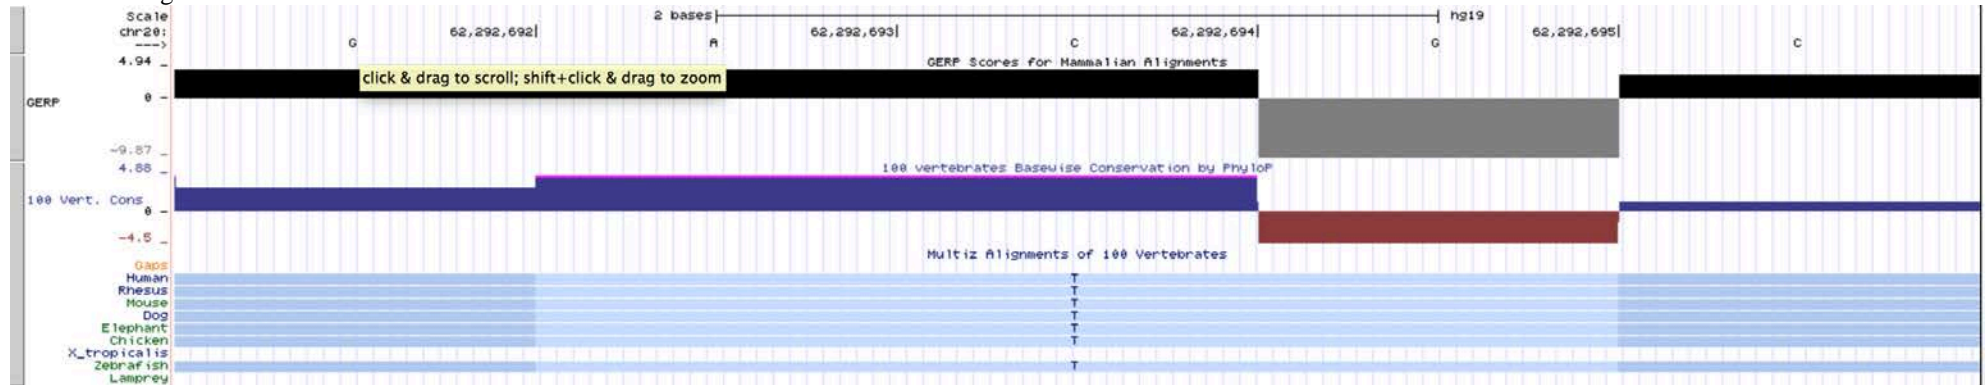

FAMILY B : g.62298844

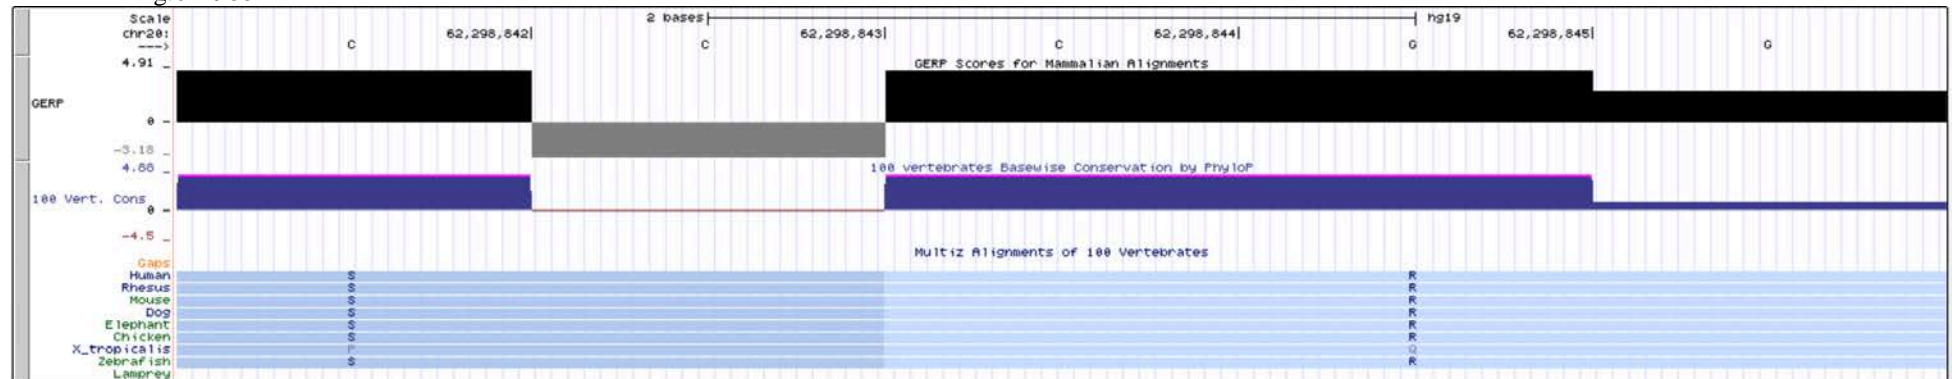

FAMILY C : g.62324534

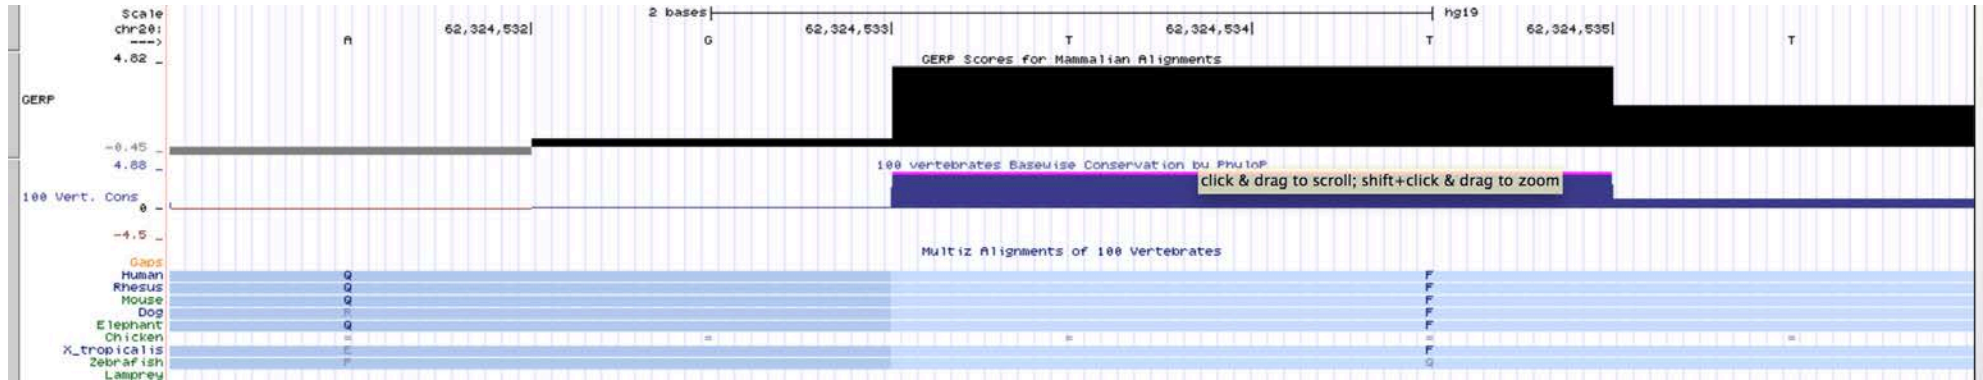

FAMILY D : g.62326565

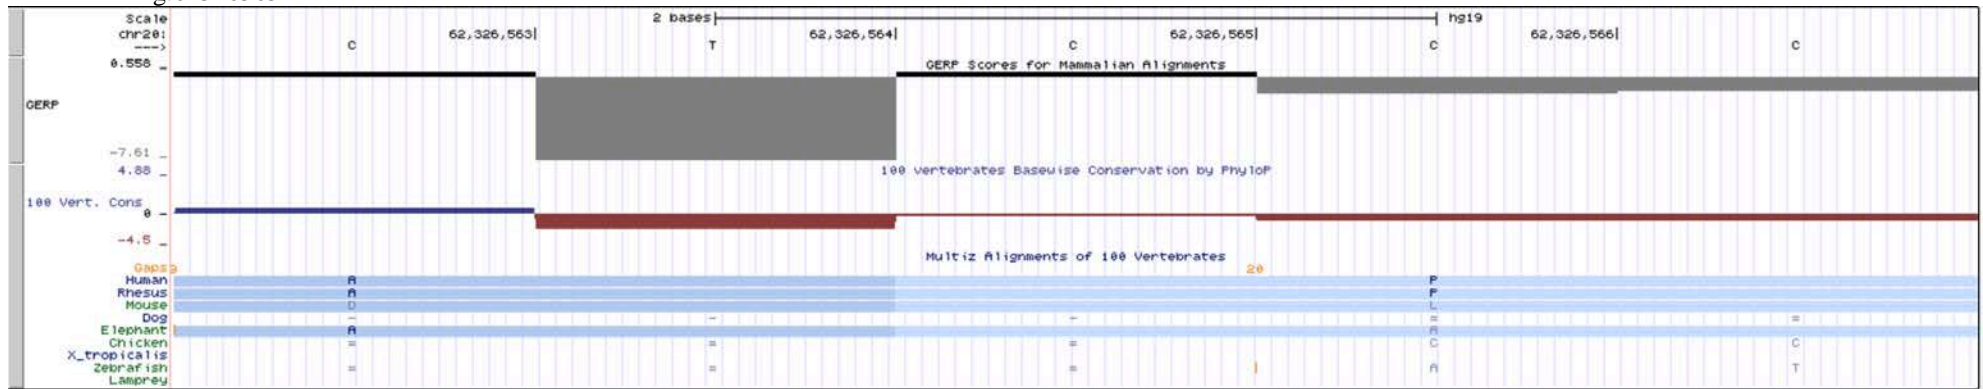

Supplement: ERJ-00401-2015_supplement.pdf [file ERJ-00401-2015_supplement.pdf]
